# Supplementary material for: Exome sequencing reveals novel causes as well as new candidate genes for human globozoospermia
Source: PubMed Central journal article supplement (PMC6993856; doi:10.1093/humrep/dez246), 2020-01-27
Supplement: suppl_fig5_dez246.pdf [file suppl_fig5_dez246.pdf]

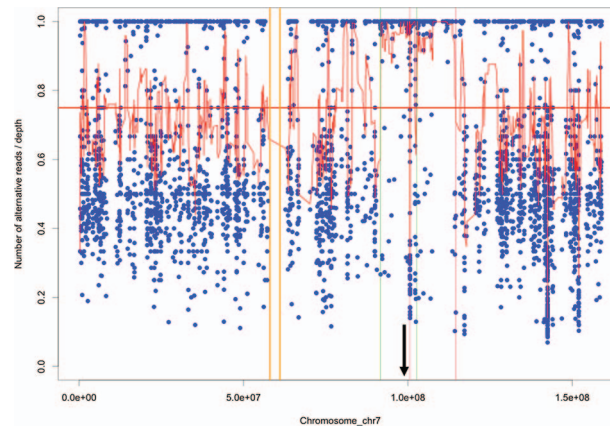

**Supplementary Figure S5** Homozygosity stretch on chromosome 7 in ARG13. The stretch is located between chr7:91645265 and 100612945. The blue dots represent the variants, the vertical orange lines represent the centromere, the horizontal red line is a moving average of the mean frequency of the alternative allele of nearby variants, the vertical green and red lines represent the start and stop location of the homozygosity stretch and the black arrow represents the location of *C7orf61*. The figure was made by RareVariantVis. Positions refer to genome build GRCh37/hg19.
