# Supplementary material for: Exome sequencing reveals novel causes as well as new candidate genes for human globozoospermia
Source: PubMed Central journal article supplement (PMC6993856; doi:10.1093/humrep/dez246), 2020-01-27
Supplement: suppl_fig6_dez246.pdf [file suppl_fig6_dez246.pdf]

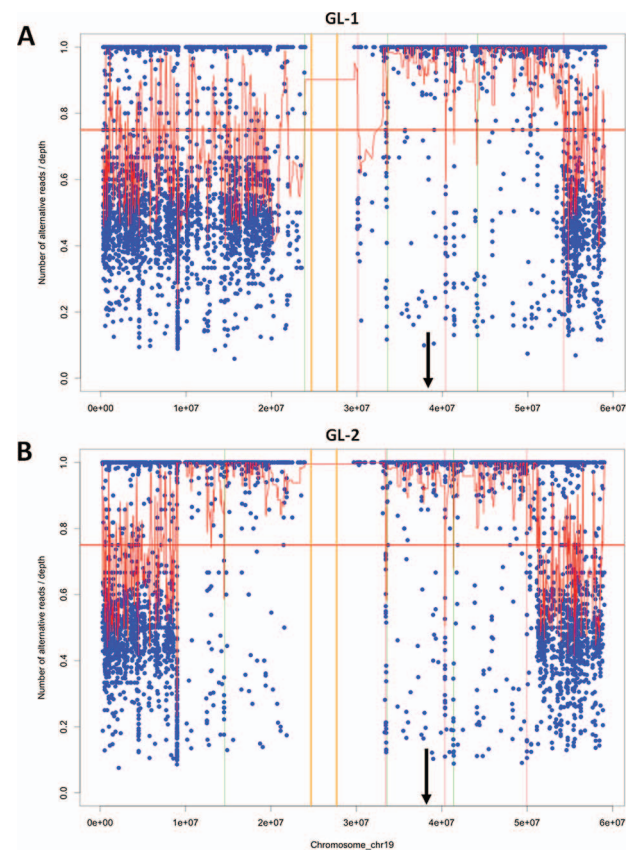

**Supplementary Figure S6 Homozygosity stretch on chromosome 19 in GL-1 and GL-2.** **A:** The stretch is located between chr19:33597816 and 40 368 733. **B:** The stretch is located between chr19:33597816 and 40 368 499. The blue dots represent the variants, the vertical orange lines represent the centromere, the horizontal red line is a moving average of the mean frequency of the alternative allele of nearby variants, the vertical green and red lines represent the start and stop location of the homozygosity stretch and the black arrow represents the location of *GGN*. The figure was made by RareVariantVis. Positions refer to genome build GRCh37/hg19.
