# Supplementary material for: Exome sequencing reveals novel causes as well as new candidate genes for human globozoospermia
Source: PubMed Central journal article supplement (PMC6993856; doi:10.1093/humrep/dez246), 2020-01-27
Supplement: suppl_fig7_dez246.pdf [file suppl_fig7_dez246.pdf]

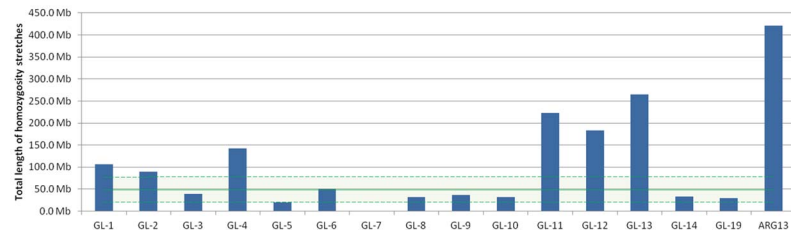

**Supplementary Figure S7 Total length of homozygosity stretches in each patient.** Control values of the average total length of homozygosity stretches found in individuals from the Netherlands (in-house exome sequencing database) is depicted as a green solid line. The shaded green band represents 68% of the normal distribution of total lengths between 1 standard deviation from the mean (green dashed lines). An increased length of homozygosity stretches was found in GL-1, GL-2, GL-4, GL-11, GL-12, GL-13 and ARG13.
