# Supplementary material for: Exome sequencing reveals novel causes as well as new candidate genes for human globozoospermia
Source: PubMed Central journal article supplement (PMC6993856; doi:10.1093/humrep/dez246), 2020-01-27
Supplement: suppl_tables1_dez246.pdf [file suppl_tables1_dez246.pdf]

Supplementary Table S1 *DPY19L2* PCR and Sanger sequencing primers.

| Exon | Primer  | Sequence (5'–3')            | Annealing temperature (°C) | Product length (bp) |
|------|---------|-----------------------------|----------------------------|---------------------|
| 1    | Forward | GACCCAGCTCCACCATACTCCTT     | 64                         | 504                 |
|      | Reverse | GGCCAACCTCTTTCTACTCGGAC     |                            |                     |
| 2    | Forward | GACAGGATTAGCTGGCCG          | 62                         | 386                 |
|      | Reverse | AGCAAAAATATTTTAATTCATAAGTG  |                            |                     |
| 3    | Forward | GCAACGTACCTGGCCACAG         | 65                         | 430                 |
|      | Reverse | TATAGCTTATGAAACAGTGCAAGTTGA |                            |                     |
| 4    | Forward | CAAAATAGCGAGAAGTGATTAG      | 61                         | 414                 |
|      | Reverse | TTCTACTCAACTATAAGGATACAC    |                            |                     |
| 5    | Forward | AGCTTCATCCATGCTACTAT        | 61                         | 432                 |
|      | Reverse | AGCCTTCTCAGAAAACACTATTTT    |                            |                     |
| 6    | Forward | GGGTAAATAATTAACACAGCA       | 50                         | 462                 |
|      | Reverse | AAACAACAGAATAAAAGGGAT       |                            |                     |
| 7    | Forward | AATTTATACGTACACTTTTTAGAATTA | 57                         | 420                 |
|      | Reverse | ATTTAAACATTTCAATCAACATGC    |                            |                     |
| 8    | Forward | TGGACATGGTAGTTAATTGCTG      | 65                         | 371                 |
|      | Reverse | TCCCAAAGTGCTGAATTGAA        |                            |                     |
| 9    | Forward | TTAATGGTAAATTACAATGTTAATA   | 52                         | 429                 |
|      | Reverse | CATGGCATACTTTACCTACA        |                            |                     |
| 10   | Forward | CATCCATCTTTTAATTCTG         | 57                         | 479                 |
|      | Reverse | ATACATTTCCAGTTTTCTTCT       |                            |                     |
| 11   | Forward | GAGTGATAATCAGGAAAGGGC       | 56                         | 320                 |
|      | Reverse | TTTGGCCAAGAGTCATTCATC       |                            |                     |
| 12   | Forward | GGTATTTAAGTGAGGAAATAAT      | 48                         | 422                 |
|      | Reverse | TTTAAGACAGTAGCTATTTATTAAC   |                            |                     |
| 13   | Forward | AATTTTTCTATGTCATTTGTAGAC    | 57                         | 306                 |
|      | Reverse | CCAATAACTCGTCTAGAGACCTTAG   |                            |                     |
| 14   | Forward | ATTACTGTCTATAGGCTATAATCAC   | 64                         | 475                 |
|      | Reverse | TTCCAAGTGGCCTAGATTATC       |                            |                     |
| 15   | Forward | ATTATTTTATTAAGGCATGGAAGAC   | 62                         | 315                 |
|      | Reverse | AATTCTGAGCAATTTGCATTC       |                            |                     |
| 16   | Forward | TTCTGCTTTCTTATAAACCCCT      | 58                         | 453                 |
|      | Reverse | TCATATTTCTTTCTTAATCAC       |                            |                     |
| 17   | Forward | ATCCTTCAACACTTCTGAGCTTG     | 56                         | 507                 |
|      | Reverse | AATCTAAGATCAAGCAAATGAAGC    |                            |                     |
| 18   | Forward | GAATACTGATAGGCTTATTACTAAG   | 61                         | 331                 |
|      | Reverse | TTAGTCAGCAAAGCCACA          |                            |                     |
| 19   | Forward | TGAGAATTTATTGTTGACCCTACG    | 61                         | 544                 |
|      | Reverse | TGTCTGAGAGTTAAAGGACATAACTTA |                            |                     |
| 20   | Forward | CAATTTCTAGCCCCAAGATAGT      | 65                         | 505                 |
|      | Reverse | TCCAGAGGCAACAGGTACG         |                            |                     |
|      |         | Sequence with:              |                            |                     |
| 21   | Forward | GGGAGTTGCCAAGTGAGTCT        | 55                         | 345                 |
|      | Reverse | CTGTTTTGAGTCATGTATATCG      |                            |                     |
| 22   | Forward | ATTCTTAAAGAATCAGGACTACTA    | 61                         | 313                 |
|      | Reverse | ATTGTCTCTAGACAGCAATACAT     |                            |                     |
