# Supplementary material for: Exome sequencing reveals novel causes as well as new candidate genes for human globozoospermia
Source: PubMed Central journal article supplement (PMC6993856; doi:10.1093/humrep/dez246), 2020-01-27
Supplement: suppl_tables2_dez246.pdf [file suppl_tables2_dez246.pdf]

**Supplementary Table SII Thermal cycling conditions *DPY19L2* PCR.**

| <b>96°C</b> | <b>15 min</b> | <b>1 cycle</b> |
|-------------|---------------|----------------|
| 94°C        | 30 s          |                |
| xx°C*       | 1 min 30 s    | 31 cycles**    |
| 72°C        | 1 min 30 s    |                |
| 72°C        | 10 min        | 1 cycle        |
| ∞           | 10°C          |                |

\*Adjust according to primer pair used as described in Supplemental Table S1. \*\*In case of poor performance of the PCR reaction or poor DNA quality, the number of cycles can be increased to 34 cycles.
