# Supplementary material for: Exome sequencing reveals novel causes as well as new candidate genes for human globozoospermia
Source: PubMed Central journal article supplement (PMC6993856; doi:10.1093/humrep/dez246), 2020-01-27
Supplement: suppl_tables3_dez246.pdf [file suppl_tables3_dez246.pdf]

**Supplementary Table SIII Exome data variant filtering. Number of variants (genes) in the filtering process per patient.**

|                                                                          | GL-1*               | GL-2*               | GL-3                | GL-4                | GL-5                | GL-6*               | GL-7*               | GL-8*               | GL-9*               | GL-10               | GL-11               | GL-12               | GL-13               | GL-19               | ARG13              |
|--------------------------------------------------------------------------|---------------------|---------------------|---------------------|---------------------|---------------------|---------------------|---------------------|---------------------|---------------------|---------------------|---------------------|---------------------|---------------------|---------------------|--------------------|
| All variants (genes)                                                     | 120 561<br>(16 104) | 117 926<br>(16 032) | 116 939<br>(16 060) | 125 504<br>(16 411) | 122 126<br>(16 138) | 114 545<br>(15 971) | 116 273<br>(15 969) | 118 482<br>(16 036) | 125 517<br>(16 267) | 127 436<br>(16 242) | 127 964<br>(16 406) | 129 222<br>(16 375) | 124 834<br>(16 096) | 122 653<br>(16 116) | 94 004<br>(14 840) |
| Quality filter (>5 variant reads and > 15% variation)                    | 98 839<br>(15 566)  | 96 341<br>(15 959)  | 93 555<br>(15 424)  | 102 644<br>(15 843) | 100 440<br>(15 601) | 90 234<br>(15 260)  | 94 018<br>(15 356)  | 95 265<br>(15 423)  | 107 070<br>(15 824) | 110 111<br>(15 874) | 108 950<br>(15 993) | 110 826<br>(15 982) | 107 164<br>(15 704) | 103 887<br>(15 665) | 73 039<br>(13 940) |
| Rare (<0.5%) non-synonymous and splice variants                          | 637<br>(558)        | 619<br>(541)        | 484<br>(420)        | 748<br>(646)        | 548<br>(452)        | 500<br>(414)        | 520<br>(428)        | 510<br>(419)        | 521<br>(438)        | 483<br>(422)        | 628<br>(583)        | 659<br>(554)        | 601<br>(528)        | 543<br>(433)        | 826<br>(681)       |
| Familial filtering**                                                     | 217 (188)           | -                   | -                   | -                   | -                   | 239 (216)           | 237 (196)           | -                   | -                   | -                   | -                   | -                   | -                   | -                   | -                  |
| Homozygous variants                                                      | 14 (14)             | 7 (5)               | 25 (24)             | 9 (8)               | 3 (3)               | 3 (3)               | 3 (3)               | 6 (5)               | 27 (25)             | 34 (21)             | 38 (36)             | 9 (6)               | 66 (55)             |                     |                    |
| Compound heterozygous variants                                           | 42 (14)             | 101 (37)            | 168 (66)            | 140 (44)            | 65 (22)             | 53 (13)             | 97 (36)             | 149 (50)            | 155 (50)            | 111 (38)            | 163 (53)            | 220 (75)            |                     |                     |                    |
| X-linked variants                                                        | 0                   | 9 (9)               | 12 (12)             | 2 (2)               | 3 (3)               | 0                   | 3 (3)               | 0                   | 9 (9)               | 5 (5)               | 4 (4)               | 7 (4)               |                     |                     |                    |
| Y-linked variants                                                        | 0                   | 0                   | 0                   | 0                   | 0                   | 0                   | 0                   | 0                   | 0                   | 0                   | 0                   | 0                   | 0                   | 0                   | 1 (1)              |
| Testis enriched                                                          | 5 (3)               | 15 (8)              | 28 (14)             | 27 (11)             | 7 (4)               | 6 (3)               | 11 (4)              | 24 (13)             | 22 (11)             | 21 (14)             | 14 (6)              | 32 (13)             |                     |                     |                    |
| High-quality candidate variants classified as VUS or (likely) pathogenic | 1 (1)               | 3 (2)               | 1 (1)               | 0 (0)               | 0 (0)               | 0 (0)               | 0 (0)               | 0 (0)               | 2 (2)               | 1 (1)               | 5 (4)               | 0 (0)               | 0 (0)               | 1 (1)               |                    |
