# Supplementary material for: Exome sequencing reveals novel causes as well as new candidate genes for human globozoospermia
Source: PubMed Central journal article supplement (PMC6993856; doi:10.1093/humrep/dez246), 2020-01-27
Supplement: suppl_tables4_dez246.pdf [file suppl_tables4_dez246.pdf]

**Supplementary Table SIV Details of all prioritized and validated variants identified in this study.**

| Patient Gene | gDNA             | cDNA                                                                | Protein                         | Zygoty       | In-homozygosity region | GnomAD variant frequency (population with highest frequency)* | Align GVDG** (Tavtigian et al., 2006) | SIFT (Vaser et al., 2016) | Mutation Taster (Schwarz et al., 2010) | PolyPhen2 Variant classification according to the ACMG/AMP 2015 guideline | Mouse model                                    | Link to acrosome biology   | Conclusion         |
|--------------|------------------|---------------------------------------------------------------------|---------------------------------|--------------|------------------------|---------------------------------------------------------------|---------------------------------------|---------------------------|----------------------------------------|---------------------------------------------------------------------------|------------------------------------------------|----------------------------|--------------------|
| GL-1         | GGN              | Chr19(GRCh37): NM_152657.3 (GGN):c.1271del                          | p.(Gly424 Alafs*65)             | Homozygous   | Yes                    | 0.00% (SAS: 0.01%)                                            | N/A                                   | N/A                       | N/A                                    | Likely pathogenic                                                         | Yes, meiotic arrest (Jamsai et al., 2013)      | No                         | Possibly causative |
| GL-2         |                  |                                                                     |                                 |              |                        |                                                               |                                       |                           |                                        |                                                                           |                                                |                            |                    |
| GL-3         | DNAH17           | Chr17(GRCh37): NM_173628.3 (DNAH17): g.76533410G > A c.2830C > T    | p.(Arg944Trp)<br>p.(Phe2594Ile) | Heterozygous | No                     | 0.15% (NFE: 0.24%)<br>Absent                                  | C0                                    | Deleterious Tolerated     | Disease-causing Disease-causing        | Uncertain significance<br>Uncertain significance                          | Yes, male infertility (Dickinson et al., 2016) | No                         | Possibly causative |
| GL-3         | MAGEA3           | ChrX(GRCh37): NM_005362.3 (MAGEA3): g.151935566G > A c.601C > T     | p.(Leu201Phe)                   | Hemizygous   | N/A                    | 0.00% (SAS: 0.01%)                                            | C0                                    | Tolerated                 | Polymorphism                           | Uncertain significance                                                    | No                                             | No                         | Unlikely causative |
| GL-4         | C2CD6 (ALS2CR11) | Chr2(GRCh37): NM_001168221.1 (C2CD6): g.202467979 T > C c.338A > G  | p.(His113Arg)                   | Homozygous   | Yes                    | Absent                                                        | C0                                    | Deleterious               | Polymorphism                           | Uncertain significance                                                    | No                                             | Yes (Wang et al., 2015)    | Possibly causative |
| GL-11        | ZPBP             | Chr7(GRCh37): NM_007009.2 (ZPBP): g.50022968G > A c.931C > T        | p.(Gln311*)                     | Homozygous   | Yes                    | Absent                                                        | N/A                                   | N/A                       | N/A                                    | Likely pathogenic                                                         | Yes, globozoospermia (Lin et al., 2007)        | Yes (Lin et al., 2007)     | Likely causative   |
| GL-11        | TM4SF19          | Chr3(GRCh37): NM_001204897.1 (TM4SF19): g.196053903C > A c.202G > T | p.(Val68Leu)                    | Homozygous   | No                     | 0.02% (OTH: 0.15%)                                            | C0                                    | Deleterious               | Disease-causing                        | Uncertain significance                                                    | No                                             | No                         | Unlikely causative |
| GL-12        | CCIN             | Chr9(GRCh37): NM_005893.2 (CCIN):c.853G > A                         | p.(Gly285Ser)                   | Homozygous   | Yes                    | 0.00% (NFE: 0.01%)                                            | C55                                   | Deleterious               | Disease-causing                        | Uncertain significance                                                    | No                                             | Yes (Lecuyer et al., 2000) | Possibly causative |
| GL-13        | CCDC62           | Chr12(GRCh37): NM_201435.4 (CCDC62): g.123270311C > T c.442C > T    | p.(Gln148*)<br>p.(His283Tyr)    | Homozygous   | Yes                    | Absent<br>0.01% (NFE: 0.01%)                                  | N/A                                   | N/A                       | Polymorphism                           | Likely pathogenic<br>Uncertain significance                               | Yes, globozoospermia (Li et al., 2017)         | Yes (Li et al., 2017)      | Likely causative   |
| GL-13        | CCDC73           | Chr11(GRCh37): NM_001008391.2 (CCDC73): g.32676493dup c.671dup      | p.(Leu224 Phefs*11)             | Homozygous   | Yes                    | 0.00% (NFE: 0.00%)                                            | N/A                                   | N/A                       | N/A                                    | Uncertain significance                                                    | Yes, no infertility (Khan et al., 2018)        | No                         | Unlikely causative |

Continued

Supplementary Table SIV Continued.

| Patient Gene  | gDNA                           | cDNA                               | Protein            | Zygosity   | In-homozygosity region | GnomAD variant frequency (population with highest frequency)* | Align GVG D** (Tavtigian et al., 2006) | SIFT (Vaser et al., 2016) | Mutation Taster (Schwarz et al., 2010) | PolyPhen2 (Adzhubei et al., 2010) | Variant classification according to the ACMG/AMP 2015 guideline | Mouse model | Link to acrosome biology    | Conclusion         |
|---------------|--------------------------------|------------------------------------|--------------------|------------|------------------------|---------------------------------------------------------------|----------------------------------------|---------------------------|----------------------------------------|-----------------------------------|-----------------------------------------------------------------|-------------|-----------------------------|--------------------|
| GL-13 NR1P3   | Chr11(GRCh37): 8,9009122A > T  | NM_020645.2 (NR1P3): c.395 T > A   | p.(Ile132Asn)      | Homozygous | Yes                    | Absent                                                        | C65                                    | Deleterious               | Disease-causing                        | Possibly damaging                 | Uncertain significance                                          | No          | No                          | Unlikely causative |
| GL-13 ATP8A2  | Chr13(GRCh37): 8,26273432G > A | NM_016529.5 (ATP8A2): c.2333G > A  | p.(Arg778Gln)      | Homozygous | Yes                    | 0.04% (ASJ); 0.10%                                            | C0                                     | Deleterious               | N/A                                    | N/A                               | Uncertain significance                                          | No          | No                          | Unlikely causative |
| ARG13 C7orf61 | Chr7(GRCh37): g.100061114del   | NM_001004323.2 (C7orf61): c.259del | p.(Glu87 Argfs*46) | Homozygous | Yes                    | Absent                                                        | N/A                                    | N/A                       | N/A                                    | N/A                               | Likely pathogenic                                               | No          | Yes (Behrouzi et al., 2013) | Possibly causative |

\*GnomAD variant frequency was downloaded from <http://gnomad.broadinstitute.org/> (version 2.1). SAS: South Asian, NFE: Non-Finnish European, OTH: Other, ASJ: Ashkenazi Jewish.

\*\*Align GVG D (<http://agvgd.iarc.fr/>) classified missense mutations in categories C0, C15, C25, C45, C55 and C65, of which C0 is least likely to be pathogenic and C65 is most likely to be pathogenic.
