# Supplementary material for: Exome sequencing reveals novel causes as well as new candidate genes for human globozoospermia
Source: PubMed Central journal article supplement (PMC6993856; doi:10.1093/humrep/dez246), 2020-01-27
Supplement: suppl_tables5_dez246.pdf [file suppl_tables5_dez246.pdf]

**Supplementary Table SV Homozygosity stretches larger than 1 Mb as called by RareVariantVis.**

| Sample | Chromosome | start_positions | end_positions | length     | var_in_reg | perc_HMZ |
|--------|------------|-----------------|---------------|------------|------------|----------|
| GL-I   | chr1       | 48 695 081      | 58 939 634    | 10 244 553 | 315        | 92.72    |
| GL-I   | chr5       | 61 654 187      | 101 631 761   | 39 977 574 | 760        | 96.19    |
| GL-I   | chr19      | 33 597 816      | 40 368 733    | 6 770 917  | 581        | 94.33    |
| GL-I   | chr19      | 44 118 188      | 54 182 249    | 10 064 061 | 1238       | 93.95    |
| GL-II  | chr1       | 167 403 504     | 181 732 904   | 14 329 400 | 587        | 95.75    |
| GL-II  | chr2       | 120 204 617     | 127 811 712   | 7 607 095  | 98         | 87.88    |
| GL-II  | chr2       | 179 623 758     | 185 802 363   | 6 178 605  | 143        | 86.11    |
| GL-II  | chr3       | 2 925 015       | 10 088 308    | 7 163 293  | 242        | 96.71    |
| GL-II  | chr3       | 10 258 493      | 49 725 910    | 39 467 417 | 1262       | 96.83    |
| GL-II  | chr3       | 49 785 133      | 69 036 678    | 19 251 545 | 589        | 95.25    |
| GL-II  | chr3       | 189 586 876     | 195 395 328   | 5 808 452  | 222        | 92.38    |
| GL-II  | chr4       | 17 513 498      | 38 020 205    | 20 506 707 | 253        | 90.16    |
| GL-II  | chr4       | 102 839 008     | 108 641 317   | 5 802 309  | 109        | 90.91    |
| GL-II  | chr4       | 126 328 453     | 135 121 066   | 8 792 613  | 70         | 87.32    |
| GL-II  | chr7       | 31 011 349      | 55 249 063    | 24 237 714 | 686        | 94.47    |
| GL-II  | chr8       | 94 805 245      | 101 721 709   | 6 916 464  | 131        | 92.42    |
| GL-II  | chr8       | 102 701 136     | 113 323 584   | 10 622 448 | 156        | 91.08    |
| GL-II  | chr9       | 130 854 461     | 136 083 580   | 5 229 119  | 660        | 97.73    |
| GL-II  | chr13      | 20 325 337      | 28 882 948    | 8 557 611  | 324        | 90.46    |
| GL-II  | chr13      | 33 315 186      | 49 951 310    | 16 636 124 | 447        | 91.96    |
| GL-II  | chr16      | 65 007 127      | 70 163 504    | 5 156 377  | 143        | 88.19    |
| GL-II  | chr16      | 71 219 021      | 76 461 273    | 5 242 252  | 228        | 90.83    |
| GL-12  | chr4       | 172 735 897     | 184 606 653   | 11 870 756 | 155        | 94.23    |
| GL-12  | chr5       | 66 198 350      | 74 988 395    | 8 790 045  | 162        | 87.73    |
| GL-12  | chr5       | 76 645 529      | 89 814 604    | 13 169 075 | 199        | 89       |
| GL-12  | chr6       | 142 718 801     | 149 780 737   | 7 061 936  | 110        | 87.39    |
| GL-12  | chr7       | 8 791 618       | 16 606 084    | 7 814 466  | 156        | 88.54    |
| GL-12  | chr8       | 20 008 012      | 36 786 396    | 16 778 384 | 605        | 95.05    |
| GL-12  | chr9       | 27 292 703      | 33 386 144    | 6 093 441  | 55         | 85.71    |
| GL-12  | chr9       | 33 941 453      | 66 456 907    | 32 515 454 | 289        | 92.76    |
| GL-12  | chr9       | 71 550 096      | 77 502 322    | 5 952 226  | 166        | 89.82    |
| GL-12  | chr9       | 97 885 616      | 111 642 535   | 13 756 919 | 278        | 93.19    |
| GL-12  | chr13      | 36 402 079      | 43 597 706    | 7 195 627  | 189        | 92.11    |
| GL-12  | chr15      | 29 418 574      | 38 230 565    | 8 811 991  | 262        | 89.73    |
| GL-12  | chr15      | 50 789 125      | 60 647 802    | 9 858 677  | 365        | 95.36    |
| GL-13  | chr2       | 45 895          | 10 183 748    | 10 137 853 | 246        | 94.33    |
| GL-13  | chr2       | 98 195 213      | 107 450 589   | 9 255 376  | 324        | 94.15    |
| GL-13  | chr2       | 120 199 140     | 127 808 127   | 7 608 987  | 118        | 86.55    |
| GL-13  | chr3       | 149 686 367     | 167 218 188   | 17 531 821 | 283        | 92.61    |
| GL-13  | chr6       | 64 694 620      | 90 334 101    | 25 639 481 | 417        | 95.69    |
| GL-13  | chr7       | 75 044 385      | 86 800 351    | 11 755 966 | 322        | 88.85    |
| GL-13  | chr8       | 11 163 586      | 22 019 071    | 10 855 485 | 452        | 91.83    |
| GL-13  | chr11      | 2 991 219       | 18 318 550    | 15 327 331 | 975        | 97.85    |
| GL-13  | chr11      | 18 319 279      | 47 644 277    | 29 324 998 | 762        | 97.25    |
| GL-13  | chr11      | 49 075 605      | 56 143 510    | 7 067 905  | 88         | 89.89    |
| GL-13  | chr11      | 57 081 475      | 71 280 213    | 14 198 738 | 1128       | 96.19    |

Continued

**Supplementary Table SV Continued.**

| Sample | Chromosome | start_positions | end_positions | length     | var_in_reg | perc_HMZ |
|--------|------------|-----------------|---------------|------------|------------|----------|
| GL-13  | chr11      | 71 714 526      | 82 560 445    | 10 845 919 | 387        | 92.27    |
| GL-13  | chr12      | 92 383 199      | 103 271 350   | 10 888 151 | 345        | 93.64    |
| GL-13  | chr12      | 119 960 612     | 129 181 719   | 9 221 107  | 537        | 94.24    |
| GL-13  | chr13      | 24 411 772      | 36 397 031    | 11 985 259 | 446        | 92.84    |
| GL-13  | chr14      | 88 921 716      | 96 129 023    | 7 207 307  | 399        | 93.75    |
| GL-13  | chr15      | 65 344 105      | 90 119 614    | 24 775 509 | 996        | 96.29    |
| GL-13  | chr20      | 8 737 466       | 23 358 233    | 14 620 767 | 340        | 91.79    |
| GL-19  | chr11      | 49 076 963      | 56 143 510    | 7 066 547  | 89         | 85.56    |
| GL-2   | chr1       | 48 459 907      | 60 474 375    | 12 014 468 | 337        | 95.27    |
| GL-2   | chr19      | 14 583 146      | 33 444 556    | 18 861 410 | 836        | 94.62    |
| GL-2   | chr19      | 33 597 816      | 40 368 499    | 6 770 683  | 587        | 94.56    |
| GL-2   | chr19      | 41 382 653      | 49 964 804    | 8 582 151  | 968        | 94.22    |
| GL-2   | chr20      | 12 989 901      | 25 755 585    | 12 765 684 | 359        | 94.72    |
| GL-2   | chr20      | 30 407 213      | 39 991 171    | 9 583 958  | 400        | 92.77    |
| GL-3   | chr16      | 58 544 295      | 66 551 294    | 8 006 999  | 66         | 85.07    |
| GL-4   | chr2       | 197 172 816     | 218 683 368   | 21 510 552 | 641        | 94.08    |
| GL-4   | chr5       | 76 645 529      | 101 627 414   | 24 981 885 | 460        | 95.88    |
| GL-4   | chr11      | 94 782 539      | 114 421 674   | 19 639 135 | 481        | 94.19    |
| GL-4   | chr12      | 52 649 887      | 78 534 233    | 25 884 346 | 915        | 94.87    |
| GL-4   | chr19      | 15 521 175      | 33 444 588    | 17 923 413 | 739        | 94.05    |
| GL-4   | chr19      | 34 288 184      | 39 930 256    | 5 642 072  | 427        | 92.52    |
| GL-4   | chr20      | 56 137 807      | 62 959 363    | 6 821 556  | 483        | 95.45    |
| GL-8   | chr12      | 32 974 245      | 40 922 280    | 7 948 035  | 126        | 86.61    |
| ARG13  | chr1       | 180 905 352     | 206 567 100   | 25 661 748 | 761        | 95.54    |
| ARG13  | chr1       | 206 760 474     | 236 385 116   | 29 624 642 | 812        | 95.2     |
| ARG13  | chr2       | 45 895          | 24 300 715    | 24 254 820 | 318        | 95.3     |
| ARG13  | chr3       | 75 786 608      | 101 431 537   | 25 644 929 | 255        | 92.19    |
| ARG13  | chr3       | 105 260 518     | 118 913 337   | 13 652 819 | 280        | 94.31    |
| ARG13  | chr4       | 144 467 104     | 154 506 707   | 10 039 603 | 135        | 90.44    |
| ARG13  | chr7       | 91 645 265      | 100 612 945   | 8 967 680  | 320        | 93.15    |
| ARG13  | chr7       | 102 668 177     | 114 562 833   | 11 894 656 | 206        | 89.86    |
| ARG13  | chr8       | 11 606 312      | 101 719 004   | 90 112 692 | 1544       | 95.53    |
| ARG13  | chr9       | 25 677 698      | 33 386 399    | 7 708 701  | 104        | 93.33    |
| ARG13  | chr9       | 34 125 258      | 45 727 961    | 11 602 703 | 203        | 91.67    |
| ARG13  | chr9       | 71 114 312      | 79 009 106    | 7 894 794  | 123        | 88.71    |
| ARG13  | chr11      | 9 760 043       | 20 648 556    | 10 888 513 | 390        | 91.05    |
| ARG13  | chr12      | 64 011 878      | 111 290 599   | 47 278 721 | 824        | 95.27    |
| ARG13  | chr15      | 56 140 995      | 72 955 060    | 16 814 065 | 579        | 94.31    |
| ARG13  | chr15      | 79 064 143      | 102 512 706   | 23 448 563 | 644        | 95.04    |
| ARG13  | chr16      | 97 354          | 8 907 145     | 8 809 791  | 609        | 95.41    |
| ARG13  | chr17      | 6 355 102       | 11 778 577    | 5 423 475  | 476        | 96.65    |
| ARG13  | chr19      | 14 574 867      | 22 575 106    | 8 000 239  | 804        | 97.39    |
| ARG13  | chr19      | 22 846 964      | 33 095 208    | 10 248 244 | 98         | 90.91    |

Positions refer to genome build GRCh37/hg19.
